# Supplementary material for: Network meta-analysis: application and practice using R software
Source: PubMed Central journal article supplement (PMC6635665; doi:10.4178/epih.e2019013), 2019-04-08
Supplement: epih-41-e2019013-supplementary.pdf [file epih-41-e2019013-supplementary.pdf]

## Supplementary Material 1. R 네트워크 메타분석 코드

#예제자료는 bin\_dn (Table S1) 임.

### ▶ 베이지안 방법 “gemtc” 패키지\_이분형자료

```
#gemtc 패키지 로딩
library(gemtc)
```

```
#데이터 불러오기
```

```
data_b_bin = read.csv("bin_dn.csv", header=T)
```

```
#R_gemtc; study, treatment, responders, sampleSize 변수명 일치해야한다. 만약 아니라면
```

```
#변수이름을 네트워크 셋업시 사용할 mtc.network 함수에서 규정한대로 바꾸어 준다.
```

```
colnames(data_b_bin)<-c("study","responders", "sampleSize", "treatment")
```

```
#치료 id 생성 (mtc.network함수에서 규정한 변수명이라면 생략가능하다)
```

```
treatments_bin <- read.table(textConnection('
```

```
id description
```

```
A "Treatment A"
```

```
B "Treatment B"
```

```
C "Treatment C"
```

```
D "Treatment D"
```

```
E "Treatment E"
```

```
'), header=TRUE)
```

```
#네트워크 셋업
```

```
network_b_bin
```

```
<-
```

```
mtc.network(data.ab=data_b_bin,treatments=treatments_bin,description="Bayesian NMA  
binary data") #treatments 인자는 제외하여도 된다.
```

```
plot(network_b_bin) #network evidence map
```

```
summary(network_b_bin)
```

```
print(network_b_bin)
```

```
#네트워크 모델 설정
```

```
# Fixed effect model
```

```
model_b_bin_fe <- mtc.model(network_b_bin, linearModel='fixed', n.chain=4)
```

```
####MCMC simulation####
```

```
### burn-in 5000, iteration 10000, thin 20 #####
```

```
mcmc_b_bin_fe <- mtc.run(model_b_bin_fe, n.adapt=5000, n.iter=10000, thin=20)
```

```
plot(mcmc_b_bin_fe)
```

```
gelman.diag(mcmc_b_bin_fe)
```

```
gelman.plot(mcmc_b_bin_fe)
```

```
summary(mcmc_b_bin_fe)
```

```
### burn-in 5000, iteration 10000, thin 10 #####
```

```
mcmc_b_bin_fe <- mtc.run(model_b_bin_fe, n.adapt=5000, n.iter=10000, thin=10)
```

```
plot(mcmc_b_bin_fe)
```

```
gelman.diag(mcmc_b_bin_fe)
```

```
gelman.plot(mcmc_b_bin_fe)
```

```
summary(mcmc_b_bin_fe)
```

```
# 결과 보기
```

```

summary(mcmc_b_bin_fe)
forest(mcmc_b_bin_fe)
forest(relative.effect(mcmc_b_bin_fe, t1="A"), digits=3)

### Random effect model
model_b_bin_re <- mtc.model(network_b_bin, linearModel='random', n.chain=4)

###MCMC simulation###
### burn-in 5000, iteration 10000, thin 20 #####
mcmc_b_bin_re <- mtc.run(model_b_bin_re, n.adapt=5000, n.iter=10000, thin=20)
plot(mcmc_b_bin_re)
gelman.diag(mcmc_b_bin_re)
gelman.plot(mcmc_b_bin_re)
summary(mcmc_b_bin_re)
### burn-in 5000, iteration 10000, thin 5 #####
mcmc_b_bin_re <- mtc.run(model_b_bin_re, n.adapt=5000, n.iter=10000, thin=5)
plot(mcmc_b_bin_re)
gelman.diag(mcmc_b_bin_re)
gelman.plot(mcmc_b_bin_re)
summary(mcmc_b_bin_re)
# 결과 보기
summary(mcmc_b_bin_re)
forest(mcmc_b_bin_re)
forest(relative.effect(mcmc_b_bin_re, t1="A"), digits=3)

###Inconsistency 가정 확인: node-splitting을 통해서#####
#mtc.nodesplit에 네트워크 셋업을 넣는다.
#fixed moel
nodesplit_b_bin_fe <- mtc.nodesplit(network_b_bin, linearModel='fixed', n.adapt=5000,
n.iter=10000, thin=10)
#이건 하지말자 너무 많이 나옴 plot(nodesplit_b_bin_fe)
plot(summary(nodesplit_b_bin_fe))
#random moel
nodesplit_b_bin_re <- mtc.nodesplit(network_b_bin, linearModel='random', n.adapt=5000,
n.iter=10000, thin=5)
#이건 하지말자 너무 많이 나옴 plot(nodesplit_b_bin_re)
plot(summary(nodesplit_b_bin_re))

###치료법간 비교우위 선정###
#rank.probability에 mcmc 시뮬레이션 결과값을 넣는다.
#확률이 높은쪽이 선호되면 preferredDirection을 1을 넣고 낮은쪽이 선호되면 -1을 넣
는다.
#fixed moel
ranks_b_bin_fe <- rank.probability(mcmc_b_bin_fe, preferredDirection = -1)
print(ranks_b_bin_fe)
plot(ranks_b_bin_fe, beside=TRUE)
#random moel
ranks_b_bin_re <- rank.probability(mcmc_b_bin_re, preferredDirection = -1)
print(ranks_b_bin_re)
plot(ranks_b_bin_re, beside=TRUE)

```

▶ 빈도주의 방법 “netmeta” 패키지\_이분형자료

```
#netmeta 패키지 로딩
```

```

library(netmeta)

#데이터 불러오기
data_f_bin = read.csv("bin_dn.csv", header=T)

####raw data가 event n이라면 TE seTE형태로 바꾼다.###
#TE seTE형태라면 그냥 바로 netmeta실시하면된다.
#Binary data; dn raw data를 TE seTE로 변환하기; pairwise 명령어
#변수이름을 임의대로 바꿀수있다.
colnames(data_f_bin)<-c("studlab","event", "n", "treatment")
#pairwise로 효과크기 만들때 OR(로그변환된)로 할것인지 RR(로그변환된) 할 것인지가
중요함.
data_f_bin <- pairwise(treatment, event = event, n = n,
                      studlab = studlab, data = data_f_bin, sm ="OR" )
##변수이름을 바꾸지 않았다면 study, d, n, trt 일때
#data_f_bin <- pairwise(trt, event = d, n = n, studlab = study, data = data_f_bin, sm
="OR" )
#data_f_bin를 가지고 기존의 netmeta를 돌리면된다.
###

#네트워크 플롯에서 변수명을 직접 치료명으로 표기할때 사용한다.
tname_f_bin <- c("Placebo", "IV(single)", "IV(double)", "Topical", "Combination")

#네트워크 모델 설정

##Fixed effect model##
network_f_bin_fe <- netmeta(TE, seTE, treat1, treat2,
                          studlab, data=data_f_bin, sm="OR", reference="A",
                          comb.fixed=TRUE, comb.random=FALSE)
netgraph(network_f_bin_fe, labels=tname_f_bin) #네트워크 plot 생성
forest(network_f_bin_fe, ref = "A", digits=3, xlab = "Odds Raio")
summary(network_f_bin_fe)
print(network_f_bin_fe)

##일관성 검정##
#inconsistency test(global approach) design-by-treatment interaction random effects
model
decomp.design(network_f_bin_fe)
#inconsistency test(local approach) side split (direct vs indirect comparison)
print(netsplit(network_f_bin_fe), digits=3)

##치료간 비교우위 선정; rank test##
ranks_f_bin_fe <- netrank(network_f_bin_fe, small.values="good")
print(ranks_f_bin_fe, sort=FALSE)

##Random effect model##
network_f_bin_re <- netmeta(TE, seTE, treat1, treat2,
                          studlab, data=data_f_bin, sm="OR", reference="A",
                          comb.fixed=FALSE, comb.random=TRUE)
netgraph(network_f_bin_re, labels=tname_f_bin) #네트워크 plot 생성
forest(network_f_bin_re, ref = "A", digits=3, xlab = "Odds Raio")
summary(network_f_bin_re)
print(network_f_bin_re)

##일관성 검정##

```

```
#inconsistency test(global approach) design-by-treatment interaction random effects
model
decomp.design(network_f_bin_re)
#inconsistency test(local approach) side split (direct vs indirect comparison)
print(netsplit(network_f_bin_re), digits=3)

##치료간 비교우위 선정; rank test##
ranks_f_bin_re <- netrank(network_f_bin_re, small.values="good")
print(ranks_f_bin_re, sort=FALSE)
```

Table S1. Binary sample data for network meta-analysis

| <b>study</b>    | <b>d</b> | <b>n</b> | <b>trt</b> |
|-----------------|----------|----------|------------|
| Alshryda 2013   | 10       | 80       | D          |
| Alshryda 2013   | 26       | 81       | A          |
| Barrachina 2016 | 4        | 36       | C          |
| Barrachina 2016 | 14       | 37       | A          |
| Benoni 2000     | 9        | 20       | C          |
| Benoni 2000     | 15       | 19       | A          |
| Benoni 2001     | 4        | 18       | B          |
| Benoni 2001     | 8        | 20       | A          |
| Claeys 2007     | 1        | 20       | B          |
| Claeys 2007     | 6        | 20       | A          |
| Fraval 2017     | 1        | 50       | C          |
| Fraval 2017     | 6        | 51       | A          |
| Husted 2003     | 2        | 20       | C          |
| Husted 2003     | 7        | 20       | A          |
| Hsu 2015        | 2        | 30       | C          |
| Hsu 2015        | 9        | 30       | A          |
| Johansson 2005  | 8        | 47       | B          |
| Johansson 2005  | 23       | 53       | A          |
| Kazemi 2010     | 7        | 32       | B          |
| Kazemi 2010     | 15       | 32       | A          |
| Lee 2013        | 9        | 34       | C          |
| Lee 2013        | 20       | 34       | A          |
| Lemay 2004      | 6        | 20       | C          |
| Lemay 2004      | 13       | 19       | A          |
| Martin 2014     | 3        | 25       | D          |
| Martin 2014     | 5        | 25       | A          |
| Niskanen 2005   | 5        | 19       | C          |
| Niskanen 2005   | 8        | 20       | A          |
| North 2016      | 8        | 70       | C          |
| North 2016      | 12       | 69       | D          |
| Rajesparan 2009 | 3        | 36       | B          |
| Rajesparan 2009 | 10       | 37       | A          |
| Wang 2016       | 9        | 81       | B          |
| Wang 2016       | 10       | 38       | A          |
| Wei 2014        | 6        | 101      | B          |
| Wei 2014        | 26       | 100      | A          |
| Xie 2016        | 3        | 70       | B          |
| Xie 2016        | 4        | 70       | D          |
| Xie 2016        | 0        | 70       | E          |
| Yi 2016         | 8        | 50       | B          |
| Yi 2016         | 1        | 50       | E          |
| Yi 2016         | 19       | 50       | A          |
| Yue 2014        | 3        | 52       | D          |
| Yue 2014        | 11       | 49       | A          |

d, events; n, total sample sizes; trt, treatment. A, Placebo; B, IV(single); C, IV(double); D, Topical; E, Combination. [1,2].
